# Supplementary material for: Seven oxidative stress-related genes predict the prognosis of hepatocellular carcinoma
Source: Aging (Albany NY). 2023 Dec 14;15(24):15050–63. doi: 10.18632/aging.205330 (PMC10781471; doi:10.18632/aging.205330)
Supplement: Supplementary Table 1 [file aging-15-205330-s002.xlsx]

## Sheet: Sheet1
Supplementary Table 1. Analysis of differential gene expression between liver cancer and normal tissues suggested a total of 254 genes.
id	Normal	Tumor
TCGABDA3EP_con	0.132890322882794	0.866077321611253
TCGADDA118_con	0.632643480990883	0.367357785488107
TCGADDA3A3_con	0.588729799821112	0.412233744889746
TCGABCA10Z_con	0.632643480990883	0.367357785488107
TCGAFVA3I0_con	0.0692209915876721	0.930816367793858
TCGADDA39W_con	0.632643480990883	0.367357785488107
TCGADDA1EB_con	0.588729799821112	0.412233744889746
TCGADDA3A1_con	0.223252699772779	0.776774792321704
TCGADDA114_con	0.149036194828561	0.850996051582851
TCGADDA11D_con	0.855015424765479	0.141058571382963
TCGADDA1EC_con	0.588729799821112	0.412233744889746
TCGADDA39X_con	0.632643480990883	0.367357785488107
TCGADDA116_con	0.588729799821112	0.412233744889746
TCGADDA3A8_con	0.269522560631639	0.730501967410805
TCGADDA119_con	0.588729799821112	0.412233744889746
TCGAEPA26S_con	0.588729799821112	0.412233744889746
TCGAFVA3I1_con	0.855015424765479	0.141058571382963
TCGADDA1EG_con	0.588729799821112	0.412233744889746
TCGADDA11C_con	0.588729799821112	0.412233744889746
TCGADDA1EL_con	0.132890322882794	0.866077321611253
TCGADDA11A_con	0.632643480990883	0.367357785488107
TCGABCA10R_con	0.588729799821112	0.412233744889746
TCGABCA10Q_con	0.855015424765479	0.141058571382963
TCGABCA216_con	0.632643480990883	0.367357785488107
TCGADDA1EE_con	0.588729799821112	0.412233744889746
TCGADDA113_con	0.632643480990883	0.367357785488107
TCGAG3A3CH_con	0.588729799821112	0.412233744889746
TCGADDA39Z_con	0.632643480990883	0.367357785488107
TCGADDA3A6_con	0.104774532647004	0.895260549171034
TCGAFVA3R2_con	0.588729799821112	0.412233744889746
TCGADDA1EH_con	0.632643480990883	0.367357785488107
TCGADDA11B_con	0.588729799821112	0.412233744889746
TCGAFVA2QR_con	0.632643480990883	0.367357785488107
TCGADDA1EJ_con	0.632643480990883	0.367357785488107
TCGABDA2L6_con	0.588729799821112	0.412233744889746
TCGABCA10U_con	0.855015424765479	0.141058571382963
TCGABCA10X_con	0.588729799821112	0.412233744889746
TCGADDA3A5_con	0.632643480990883	0.367357785488107
TCGAFVA23B_con	0.588729799821112	0.412233744889746
TCGADDA39V_con	0.588729799821112	0.412233744889746
TCGABCA10Y_con	0.588729799821112	0.412233744889746
TCGABCA10T_con	0.588729799821112	0.412233744889746
TCGAEPA12J_con	0.855015424765479	0.141058571382963
TCGADDA1EI_con	0.632643480990883	0.367357785488107
TCGAESA2HT_con	0.588729799821112	0.412233744889746
TCGABCA110_con	0.269522560631639	0.730501967410805
TCGAEPA3RK_con	0.855015424765479	0.141058571382963
TCGABCA10W_con	0.632643480990883	0.367357785488107
TCGADDA3A4_con	0.126358302557	0.876895532761681
TCGADDA3A2_con	0.223252699772779	0.776774792321704
TCGAEDA7PZ_treat	-0.000133255828560386	1.0001750580503
TCGADDAAVX_treat	-0.000133255828560386	1.0001750580503
TCGADDA113_treat	-0.000133255828563179	1.00017505805031
TCGACCA5UC_treat	-0.000133255828560386	1.0001750580503
TCGADDAACX_treat	-0.000133255828560386	1.0001750580503
TCGABCA10U_treat	-0.000133255828560386	1.0001750580503
TCGADDAAE0_treat	-0.000133255828750408	1.00017505805054
TCGADDA115_treat	-5.16817729809157e-05	0.999763145418461
TCGADDAAE4_treat	0.104774532647004	0.895260549171034
TCGADDAAC8_treat	-0.000133255828563179	1.00017505805031
TCGACCA8HV_treat	-0.000133255828711018	1.00017505805049
TCGADDA73E_treat	0.00958162509501325	0.99045955479046
TCGAMRA8JO_treat	-0.000133255828560386	1.0001750580503
TCGA2YA9GU_treat	0.269522560631639	0.730501967410805
TCGADDA39W_treat	-0.000133255828560386	1.0001750580503
TCGAEPA26S_treat	-0.000133255829109921	1.00017505805099
TCGAEDA4XI_treat	0.132890322882794	0.866077321611253
TCGAZPA9CZ_treat	-0.000133255828563179	1.00017505805031
TCGAG3A3CI_treat	0.588729799821112	0.412233744889746
TCGAZPA9D0_treat	0.269522560631639	0.730501967410805
TCGADDAADU_treat	-0.000133255828560386	1.0001750580503
TCGADDA1EE_treat	-0.000133255828560386	1.0001750580503
TCGAGJA3OU_treat	-0.000133255828563179	1.00017505805031
TCGACCA7IJ_treat	-0.000133255828569373	1.00017505805031
TCGACCA8HU_treat	-0.000133255828560386	1.0001750580503
TCGAG3A5SK_treat	0.588729799821112	0.412233744889746
TCGADDAAEA_treat	-0.000133255828560386	1.0001750580503
TCGAXRA8TG_treat	0.000344469292446911	0.999376218642873
TCGADDA3A4_treat	0.044006968411167	0.956032006183278
TCGADDAAD8_treat	0.132890322882794	0.866077321611253
TCGABCA10X_treat	0.632643480990883	0.367357785488107
TCGAK7A5RF_treat	0.223252699772779	0.776774792321704
TCGAK7AAU7_treat	-0.000133255828563179	1.00017505805031
TCGAZSA9CF_treat	0.000776181639489955	1.00059086612478
TCGADDAADS_treat	0.632643480990883	0.367357785488107
TCGA2YA9GS_treat	-0.000133255828569373	1.00017505805031
TCGABCA216_treat	-0.000133255828560386	1.0001750580503
TCGADDA39X_treat	-0.000133255828560386	1.0001750580503
TCGAZSA9CG_treat	0.223252699772779	0.776774792321704
TCGABCA10W_treat	-0.000133255828563179	1.00017505805031
TCGADDA118_treat	-0.000133255828560386	1.0001750580503
TCGADDAADW_treat	-0.00013325582859687	1.00017505805035
TCGABCA3KF_treat	0.0692209915876721	0.930816367793858
TCGADDA1EI_treat	-0.000133255828569373	1.00017505805031
TCGADDAAEE_treat	-0.000133255828563179	1.00017505805031
TCGAEPA3JL_treat	-0.000133255828563179	1.00017505805031
TCGABDA2L6_treat	0.0300649515935232	0.969974916127951
TCGAG3A25Z_treat	0.044006968411167	0.956032006183278
TCGAFVA3R2_treat	-0.000133255828563179	1.00017505805031
TCGARCA7SB_treat	0.0692209915876721	0.930816367793858
TCGA5CA9VH_treat	-0.000133255828560386	1.0001750580503
TCGA5CA9VG_treat	-0.000133255828560386	1.0001750580503
TCGACC5261_treat	-0.000133255828750408	1.00017505805054
TCGARCA7SF_treat	-0.000106798418694367	1.00015515284953
TCGANIA8LF_treat	0.000408989347958427	1.0005377554532
TCGAEDA7PX_treat	-0.000133255828569373	1.00017505805031
TCGADDA11D_treat	-0.0107118330029218	0.991337054794852
TCGADDA1EB_treat	0.132890322882794	0.866077321611253
TCGA2YA9H7_treat	-0.000133255828750408	1.00017505805054
TCGAUBA7MA_treat	-0.000133255828571723	1.00017505805032
TCGABCA10Q_treat	-0.000133255828560386	1.0001750580503
TCGAG3A25Y_treat	-0.000133255829171876	1.00017505805106
TCGADDAAEH_treat	0.000408989347958427	1.0005377554532
TCGA4RAA8I_treat	0.00398077293361189	0.996060765743026
TCGADDAAD2_treat	-0.000133255828560386	1.0001750580503
TCGAZPA9D1_treat	-0.00013325583032879	1.0001750580525
TCGADDAACY_treat	0.000408989347958427	1.0005377554532
TCGAQAA7B7_treat	-0.000133255828711018	1.00017505805049
TCGAKRA7K7_treat	-0.000133255828560386	1.0001750580503
TCGADDAAVQ_treat	0.000776181639489955	1.00059086612478
TCGADDA11A_treat	0.044006968411167	0.956032006183278
TCGADDAADG_treat	-0.00013325583032879	1.0001750580525
TCGAG3A7M7_treat	-0.000133255828695756	1.00017505805047
TCGABCA5W4_treat	0.0692209915876721	0.930816367793858
TCGADDAAW2_treat	-0.000133255829109921	1.00017505805099
TCGADDAADI_treat	-0.000133255828750408	1.00017505805054
TCGADDA3A7_treat	-0.000106798418694367	1.00015515284953
TCGACCA9FW_treat	-0.000133255828560386	1.0001750580503
TCGARCA7S9_treat	0.104774532647004	0.895260549171034
TCGA3KAAZ8_treat	0.855015424765479	0.141058571382963
TCGAMIA75I_treat	-0.000133255828569373	1.00017505805031
TCGA5RAA1D_treat	-0.000133255828560386	1.0001750580503
TCGADDA116_treat	-0.000133255828560386	1.0001750580503
TCGABDA3EP_treat	-0.000133255828563179	1.00017505805031
TCGACCA123_treat	0.0238899045333268	0.976150358762296
TCGADDAAVW_treat	-0.000133255828560386	1.0001750580503
TCGADDA4NR_treat	-0.000133255828569373	1.00017505805031
TCGADDAAEG_treat	-0.000133255828560386	1.0001750580503
TCGADDA1EA_treat	-0.000133255828996008	1.00017505805085
TCGA5CAAPD_treat	-0.000190030277996391	1.00034417431138
TCGABCA110_treat	0.269522560631639	0.730501967410805
TCGABWA5NP_treat	-0.000133255828750408	1.00017505805054
TCGADDA73B_treat	0.00645435423130151	0.993587025987465
TCGAEDA66Y_treat	-0.000133255828750408	1.00017505805054
TCGACCA7II_treat	-0.000133255828560386	1.0001750580503
TCGADDAACT_treat	-0.000133255828560386	1.0001750580503
TCGACC5263_treat	-0.000133255828607195	1.00017505805036
TCGADDAADV_treat	-0.000133255828695756	1.00017505805047
TCGADDA4NB_treat	0.044006968411167	0.956032006183278
TCGAEPA2KB_treat	-0.000133255828560386	1.0001750580503
TCGADDAACA_treat	-0.000133255828750408	1.00017505805054
TCGAZSA9CD_treat	-0.000106798418694367	1.00015515284953
TCGAK7A5RG_treat	-0.000133255828695756	1.00017505805047
TCGAWXAA46_treat	0.632643480990883	0.367357785488107
TCGAEPA2KA_treat	-0.000133255828560386	1.0001750580503
TCGA5RAA1C_treat	-0.000133255828996008	1.00017505805085
TCGAEDA82E_treat	-0.000133255835861641	1.00017505805938
TCGADDAACG_treat	-0.000133255828560386	1.0001750580503
TCGAUBA7MC_treat	0.000749600630852004	0.999292145035016
TCGADDA119_treat	-0.000133255828560386	1.0001750580503
TCGAG3AAV2_treat	0.223252699772779	0.776774792321704
TCGACCA3MC_treat	-0.000133255828560386	1.0001750580503
TCGADDAACH_treat	-0.000133255828563179	1.00017505805031
TCGAG3A3CG_treat	0.132890322882794	0.866077321611253
TCGACCA3MB_treat	-0.000133255828563179	1.00017505805031
TCGADDAAD5_treat	-0.000133255828560386	1.0001750580503
TCGAEDA627_treat	0.269522560631639	0.730501967410805
TCGAZPA9CV_treat	0.149036194828561	0.850996051582851
TCGAG3A25T_treat	-0.000133255828607195	1.00017505805036
TCGADDA1EK_treat	0.00958162509501325	0.99045955479046
TCGAKRA7K8_treat	0.000344469292446911	0.999376218642873
TCGACCA9FU_treat	-0.000133255828560386	1.0001750580503
TCGAHPA5N0_treat	0.588729799821112	0.412233744889746
TCGADDAACN_treat	-0.000133255837770875	1.00017505806176
TCGARCA6M5_treat	-0.000133255828560386	1.0001750580503
TCGA2YA9GZ_treat	0.588729799821112	0.412233744889746
TCGADDAADP_treat	-0.000133255837770875	1.00017505806176
TCGA2YA9HA_treat	-0.000133255828560386	1.0001750580503
TCGANIA4U2_treat	-0.0107118330029218	0.991337054794852
TCGADDA39Y_treat	-0.000133255828560386	1.0001750580503
TCGAG3A5SL_treat	0.0350623751903554	0.96497717239565
TCGADDA73D_treat	0.000408989347958427	1.0005377554532
TCGAUBAA0U_treat	-4.53051144384824e-05	1.00011414950255
TCGABDA3ER_treat	0.132890322882794	0.866077321611253
TCGAFVA495_treat	0.104774532647004	0.895260549171034
TCGADDA3A3_treat	-0.000133255828560386	1.0001750580503
TCGADDAAVY_treat	-0.000133255828560386	1.0001750580503
TCGA2YA9HB_treat	-0.000133255828996008	1.00017505805085
TCGAKRA7K0_treat	-0.000133255828996008	1.00017505805085
TCGADDA4NF_treat	-0.000133255828695756	1.00017505805047
TCGAXRA8TF_treat	-0.000133255828560386	1.0001750580503
TCGAWXAA47_treat	-0.000133255828560386	1.0001750580503
TCGADDA4NI_treat	0.132890322882794	0.866077321611253
TCGABWA5NQ_treat	-0.000133255828560386	1.0001750580503
TCGACC5260_treat	-0.000133255828711018	1.00017505805049
TCGAFVA3I1_treat	-5.16817729809157e-05	0.999763145418461
TCGADDA1EC_treat	-0.000133255828560386	1.0001750580503
TCGAFVA3R3_treat	0.223252699772779	0.776774792321704
TCGADDAAVS_treat	-0.000133255828750408	1.00017505805054
TCGAYAA8S7_treat	-0.000133255828563179	1.00017505805031
TCGAO8A75V_treat	-0.000133255829109921	1.00017505805099
TCGABCA69H_treat	-0.000133255828560386	1.0001750580503
TCGADDAAED_treat	-0.000133255828560386	1.0001750580503
TCGARCA6M4_treat	-0.000133255829109921	1.00017505805099
TCGAFVA3I0_treat	-0.000133255837770875	1.00017505806176
TCGADDAACP_treat	-0.000133255828560386	1.0001750580503
TCGADDA73G_treat	0.000243223264635124	1.00003984821393
TCGAFVA4ZP_treat	0.000749600630852004	0.999292145035016
TCGAUBAA0V_treat	0.588729799821112	0.412233744889746
TCGA2YA9GT_treat	0.588729799821112	0.412233744889746
TCGAWJA86L_treat	0.00398077293361189	0.996060765743026
TCGACCA7IE_treat	-0.000133255828563179	1.00017505805031
TCGAG3A3CJ_treat	0.149036194828561	0.850996051582851
TCGAMRA520_treat	-0.0107118330029218	0.991337054794852
TCGADDAAE1_treat	-0.000133255828750408	1.00017505805054
TCGALGA9QC_treat	-0.000133255828560386	1.0001750580503
TCGABCA217_treat	-0.000133255828560386	1.0001750580503
TCGAEDA8O5_treat	-0.000133255828750408	1.00017505805054
TCGADDAADL_treat	-0.000923649253218467	1.00102470078826
TCGA2YA9H9_treat	0.044006968411167	0.956032006183278
TCGAG3A5SJ_treat	-0.000133255837770875	1.00017505806176
TCGADDA4NA_treat	-0.000133255828560386	1.0001750580503
TCGAG3AAV3_treat	0.00398077293361189	0.996060765743026
TCGADDA1ED_treat	0.223252699772779	0.776774792321704
TCGACCA9FS_treat	-0.000133255828560386	1.0001750580503
TCGAUBA7MB_treat	-0.000190030277996391	1.00034417431138
TCGAG3AAV0_treat	0.588729799821112	0.412233744889746
TCGAMIA75E_treat	-5.16817729809157e-05	0.999763145418461
TCGAG3AAV5_treat	-0.000133255828560386	1.0001750580503
TCGA2YA9H2_treat	-0.000133255828711018	1.00017505805049
TCGAG3A6UC_treat	0.632643480990883	0.367357785488107
TCGABCA10Z_treat	0.00398077293361189	0.996060765743026
TCGABCA10T_treat	-0.000133255829109921	1.00017505805099
TCGAG3A25V_treat	-0.000133255828996008	1.00017505805085
TCGAZPA9D2_treat	-0.000133255828695756	1.00017505805047
TCGACCA3MA_treat	-0.000133255828563179	1.00017505805031
TCGA2YA9H4_treat	-0.000190030277996391	1.00034417431138
TCGADDAACW_treat	-0.000133255828560386	1.0001750580503
TCGAT1A6J8_treat	0.044006968411167	0.956032006183278
TCGADDAA3A_treat	-0.000133255828560386	1.0001750580503
TCGADDA3A5_treat	0.000776181639489955	1.00059086612478
TCGADDA4NS_treat	0.132890322882794	0.866077321611253
TCGADDAACV_treat	0.00645435423130151	0.993587025987465
TCGACCA8HS_treat	-0.000133255828607195	1.00017505805036
TCGA2YA9GW_treat	-0.000923649253218467	1.00102470078826
TCGAPDA5DF_treat	0.126358302557	0.876895532761681
TCGADDAACF_treat	-0.000133255828560386	1.0001750580503
TCGABCA69I_treat	0.104774532647004	0.895260549171034
TCGAZPA9D4_treat	-0.000133255828560386	1.0001750580503
TCGAKRA7K2_treat	0.104774532647004	0.895260549171034
TCGAFVA2QR_treat	0.132890322882794	0.866077321611253
TCGADDA11C_treat	0.000776181639489955	1.00059086612478
TCGAFVA4ZQ_treat	-0.000133255828560386	1.0001750580503
TCGADDAAEK_treat	0.149036194828561	0.850996051582851
TCGADDAAE7_treat	0.223252699772779	0.776774792321704
TCGADDAAW3_treat	0.0149480156005945	0.985092820513352
TCGAWQA9G7_treat	-0.000133255828560386	1.0001750580503
TCGACCA8HT_treat	-0.000133255828563179	1.00017505805031
TCGADDA4ND_treat	0.00315562813720077	1.001624730316
TCGACCA1HT_treat	-0.000133255828560386	1.0001750580503
TCGADDA3A9_treat	0.104774532647004	0.895260549171034
TCGAEDA7XP_treat	-0.000133255828560386	1.0001750580503
TCGAG3A7M6_treat	-0.000190030277996391	1.00034417431138
TCGADDAADF_treat	0.104774532647004	0.895260549171034
TCGAFVA2QQ_treat	-0.000133255829109921	1.00017505805099
TCGAZPA9CY_treat	0.132890322882794	0.866077321611253
TCGADDAADJ_treat	0.000344469292446911	0.999376218642873
TCGADDAACS_treat	-4.53051144384824e-05	1.00011414950255
TCGADDA4NJ_treat	-0.000133255828560386	1.0001750580503
TCGAGJA9DB_treat	-0.000133255828996008	1.00017505805085
TCGADDAACB_treat	-0.000133255828560386	1.0001750580503
TCGA2VA95S_treat	-0.000133255828560386	1.0001750580503
TCGAEDA459_treat	-0.000133255828563179	1.00017505805031
TCGAMIA75H_treat	0.0149480156005945	0.985092820513352
TCGADDAACQ_treat	-5.16817729809157e-05	0.999763145418461
TCGAG3A25X_treat	0.00645435423130151	0.993587025987465
TCGADDAACZ_treat	-0.000133255828560386	1.0001750580503
TCGAZSA9CE_treat	0.588729799821112	0.412233744889746
TCGALGA9QD_treat	-0.000133255828560386	1.0001750580503
TCGADDAAVP_treat	-0.000133255828560386	1.0001750580503
TCGABWA5NO_treat	0.126358302557	0.876895532761681
TCGAG3A3CH_treat	0.000749600630852004	0.999292145035016
TCGADDAADN_treat	-0.000133255828560386	1.0001750580503
TCGACCA5UE_treat	-0.000133255828560386	1.0001750580503
TCGADDAACL_treat	-0.000133255828560386	1.0001750580503
TCGA2YA9H1_treat	0.0149480156005945	0.985092820513352
TCGADDAACU_treat	-0.000133255828560386	1.0001750580503
TCGA2YA9GV_treat	0.588729799821112	0.412233744889746
TCGADDAADK_treat	-0.000133255829171876	1.00017505805106
TCGABC4072_treat	-0.000133255828560386	1.0001750580503
TCGADDAAVR_treat	-0.000133255828560386	1.0001750580503
TCGARCA7SH_treat	0.000776181639489955	1.00059086612478
TCGAG3AAV7_treat	0.000749600630852004	0.999292145035016
TCGADDAACJ_treat	-0.00013325583032879	1.0001750580525
TCGACC5264_treat	-0.000190030277996391	1.00034417431138
TCGAESA2HS_treat	0.000776181639489955	1.00059086612478
TCGAEPA12J_treat	0.000408989347958427	1.0005377554532
TCGACCA7IH_treat	0.0031254248846267	0.996916168585695
TCGARCA6M3_treat	-0.000133255828560386	1.0001750580503
TCGACC5262_treat	-0.000133255828560386	1.0001750580503
TCGADDA114_treat	-0.000133255828563179	1.00017505805031
TCGADDAADD_treat	-0.000133255828560386	1.0001750580503
TCGA2YA9H0_treat	0.000749600630852004	0.999292145035016
TCGADDA1EL_treat	-0.000133255828560386	1.0001750580503
TCGADDA39V_treat	-0.000133255828560386	1.0001750580503
TCGAEDA5KG_treat	-0.000133255828560386	1.0001750580503
TCGADDA4NV_treat	0.588729799821112	0.412233744889746
TCGADDAAE2_treat	0.588729799821112	0.412233744889746
TCGADDA4NL_treat	0.632643480990883	0.367357785488107
TCGADDA3A1_treat	-0.000133255828563179	1.00017505805031
TCGADDA73A_treat	-0.00013325583032879	1.0001750580525
TCGACCA7IF_treat	0.0238899045333268	0.976150358762296
TCGADDA73F_treat	-0.000190030277996391	1.00034417431138
TCGAG3A7M9_treat	-0.000133255828560386	1.0001750580503
TCGADDA1EF_treat	-0.000133255828750408	1.00017505805054
TCGADDA4NG_treat	-0.00013325583032879	1.0001750580525
TCGADDAADC_treat	-0.000133255828560386	1.0001750580503
TCGADDA1EH_treat	-0.000133255828750408	1.00017505805054
TCGACCA3M9_treat	-0.000133255828560386	1.0001750580503
TCGADDAAD1_treat	-0.000133255828750408	1.00017505805054
TCGADDAAE6_treat	0.00645435423130151	0.993587025987465
TCGAMIA75G_treat	0.632643480990883	0.367357785488107
TCGAEDA7XO_treat	0.00645435423130151	0.993587025987465
TCGADDAAW0_treat	0.132890322882794	0.866077321611253
TCGAG3AAV4_treat	-0.000133255828563179	1.00017505805031
TCGAUBA7MF_treat	0.0238899045333268	0.976150358762296
TCGAEDA66X_treat	-0.000133255828607195	1.00017505805036
TCGA5RAAAM_treat	0.000408989347958427	1.0005377554532
TCGADDAACC_treat	-0.000133255828560386	1.0001750580503
TCGADDAADY_treat	-0.000133255837770875	1.00017505806176
TCGAFVA23B_treat	-0.000133255828750408	1.00017505805054
TCGAEDA97K_treat	-0.000133255828607195	1.00017505805036
TCGADDAADA_treat	-0.000133255858199756	1.00017505808716
TCGADDAAC9_treat	0.149036194828561	0.850996051582851
TCGAXRA8TD_treat	0.00645435423130151	0.993587025987465
TCGABCA10S_treat	0.223252699772779	0.776774792321704
TCGAXRA8TE_treat	-0.000133255828560386	1.0001750580503
TCGADDAAEB_treat	0.000776181639489955	1.00059086612478
TCGALGA6GG_treat	-0.000133255828560386	1.0001750580503
TCGABCA10R_treat	0.126358302557	0.876895532761681
TCGA2YA9H5_treat	-0.000510329899895422	1.00100808496732
TCGADDA4NP_treat	0.632643480990883	0.367357785488107
TCGACCA7IK_treat	-0.000133255828560386	1.0001750580503
TCGADDA4NN_treat	-0.000133255828560386	1.0001750580503
TCGAG3A7M5_treat	0.632643480990883	0.367357785488107
TCGADDA3A2_treat	0.588729799821112	0.412233744889746
TCGADDAAW1_treat	0.132890322882794	0.866077321611253
TCGABC4073_treat	-0.000133255828560386	1.0001750580503
TCGADDAAD0_treat	-0.000133255828563179	1.00017505805031
TCGADDA4NO_treat	-0.000133255828560386	1.0001750580503
TCGAEPA3RK_treat	-0.000133255828560386	1.0001750580503
TCGADDAAVV_treat	-0.000133255828996008	1.00017505805085
TCGABCA8YO_treat	-0.000133255828563179	1.00017505805031
TCGADDA4NQ_treat	-0.000133255828560386	1.0001750580503
TCGADDAACE_treat	0.269522560631639	0.730501967410805
TCGADDAACD_treat	-0.000133255828560386	1.0001750580503
TCGA2YA9GY_treat	-0.000133255828560386	1.0001750580503
TCGABCA3KG_treat	-0.000133255828711018	1.00017505805049
TCGACCA9FV_treat	0.000243223264635124	1.00003984821393
TCGADDA3A8_treat	-0.000133255828560386	1.0001750580503
TCGAG3AAV6_treat	-0.000133255828560386	1.0001750580503
TCGAESA2HT_treat	0.269522560631639	0.730501967410805
TCGAXRA8TC_treat	-0.000133255828560386	1.0001750580503
TCGA2YA9H3_treat	-0.000133255828560386	1.0001750580503
TCGADDAADR_treat	-0.000133255828560386	1.0001750580503
TCGACCA7IG_treat	-0.000133255828560386	1.0001750580503
TCGARCA6M6_treat	-0.000133255828560386	1.0001750580503
TCGADDA1EG_treat	-0.000133255828695756	1.00017505805047
TCGADDAADM_treat	-0.00013325582859687	1.00017505805035
TCGADDA73C_treat	0.132890322882794	0.866077321611253
TCGAG3A7M8_treat	0.588729799821112	0.412233744889746
TCGACCA7IL_treat	-0.000133255828560386	1.0001750580503
TCGAGJA6C0_treat	0.000749600630852004	0.999292145035016
TCGADDAAEI_treat	-5.16817729809157e-05	0.999763145418461
TCGADDAACK_treat	-0.00013325583032879	1.0001750580525
TCGABCA10Y_treat	-0.000190030277996391	1.00034417431138
TCGAG3A25S_treat	-0.000133255828560386	1.0001750580503
TCGAWQAB4B_treat	-0.000133255828560386	1.0001750580503
TCGADDA4NH_treat	-0.000190030277996391	1.00034417431138
TCGAWXAA44_treat	-4.53051144384824e-05	1.00011414950255
TCGARGA7D4_treat	-0.000133255828563179	1.00017505805031
TCGADDAAE3_treat	-0.000133255828560386	1.0001750580503
TCGADDAAE9_treat	0.000749600630852004	0.999292145035016
TCGARCA7SK_treat	0.126358302557	0.876895532761681
TCGADDAAVZ_treat	-0.000133255828750408	1.00017505805054
TCGAG3AAUZ_treat	0.000776181639489955	1.00059086612478
TCGAUBA7MD_treat	-0.000133255828560386	1.0001750580503
TCGAMIA75C_treat	0.000749600630852004	0.999292145035016
TCGACCA5UD_treat	0.000749600630852004	0.999292145035016
TCGAEDA7PY_treat	0.0238899045333268	0.976150358762296
TCGADDA4NK_treat	0.149036194828561	0.850996051582851
TCGAEPA2KC_treat	-0.000133255829109921	1.00017505805099
TCGADDAAD6_treat	-0.000133255828560386	1.0001750580503
TCGADDAACI_treat	0.132890322882794	0.866077321611253
TCGAG3AAV1_treat	-0.000133255828996008	1.00017505805085
TCGAG3A5SM_treat	0.126358302557	0.876895532761681
TCGADDA1EJ_treat	-0.000133255828560386	1.0001750580503
TCGADDAADO_treat	-0.000133255828560386	1.0001750580503
TCGACC5258_treat	-0.000133255828563179	1.00017505805031
TCGADDA3A6_treat	0.0300649515935232	0.969974916127951
TCGA2YA9GX_treat	-0.00013325583032879	1.0001750580525
TCGADDA11B_treat	0.588729799821112	0.412233744889746
TCGAG3A5SI_treat	-0.000133255828560386	1.0001750580503
TCGADDAAVU_treat	-0.000133255828560386	1.0001750580503
TCGABCA112_treat	-0.000133255828563179	1.00017505805031
TCGADDA4NE_treat	-0.000133255830829264	1.00017505805313
TCGAUBA7ME_treat	0.223252699772779	0.776774792321704
TCGADDAADQ_treat	-0.000133255828560386	1.0001750580503
TCGADDAAD3_treat	0.126358302557	0.876895532761681
TCGAK7A6G5_treat	0.0149480156005945	0.985092820513352
TCGADDA39Z_treat	0.104774532647004	0.895260549171034
TCGADDAACO_treat	0.0031254248846267	0.996916168585695
TCGADDAADB_treat	-0.000133255828560386	1.0001750580503
TCGACC5259_treat	0.00645435423130151	0.993587025987465
TCGAFVA496_treat	0.126358302557	0.876895532761681
TCGA2YA9H8_treat	-0.000190030277996391	1.00034417431138
TCGAHPA5MZ_treat	-0.000133255828695756	1.00017505805047
TCGA2YA9H6_treat	0.000776181639489955	1.00059086612478
TCGAEDA8O6_treat	-0.000133255828563179	1.00017505805031
TCGAG3A3CK_treat	-0.000133255828996008	1.00017505805085
TCGAG3A25U_treat	0.00958162509501325	0.99045955479046
