# Supplementary material for: Seven oxidative stress-related genes predict the prognosis of hepatocellular carcinoma
Source: Aging (Albany NY). 2023 Dec 14;15(24):15050–63. doi: 10.18632/aging.205330 (PMC10781471; doi:10.18632/aging.205330)
Supplement: Supplementary Table 2 [file aging-15-205330-s003.xlsx]

## Sheet: Sheet1
Supplementary Table 2. Univariate Cox regression demonstrates 98 genes could affect patients’ outcome.
gene	conMean	treatMean	logFC	pValue	fdr
ABCC1	1.024544742	2.125228094	1.052634701	0.007927374	0.00991646
ACADL	6.0236924	2.30127147	-1.388216919	4.01E-18	3.37E-17
ACADM	40.6674812	20.01827243	-1.022558163	1.68E-18	1.44E-17
ACADS	85.5524898	31.75930254	-1.429630611	6.44E-25	2.28E-23
ACE	0.40095779	0.827581995	1.04545189	4.49E-10	1.24E-09
ACSL4	9.30921852	47.10048971	2.339010092	2.60E-09	6.44E-09
ACTA1	0.077496407	0.221549935	1.515430572	1.96E-06	3.57E-06
ACTN2	0.073706811	1.968397148	4.73907959	5.86E-06	1.03E-05
ADAMTS13	7.4109515	1.123500595	-2.721657895	9.38E-30	9.64E-27
ADH1A	380.369918	164.1895977	-1.212040426	3.35E-17	2.53E-16
ADM	14.58440454	6.705389305	-1.121033484	4.93E-09	1.19E-08
ADRB1	0.474933191	0.199898878	-1.248454208	9.78E-12	3.29E-11
AGRN	7.79725418	17.11298624	1.134053464	9.33E-08	1.96E-07
AGTR1	23.7240112	9.860990757	-1.266543448	5.90E-21	7.48E-20
ALDH2	169.651798	70.72683726	-1.262247066	3.09E-24	7.92E-23
ALDH3A1	1.13782948	51.5345961	5.501184994	0.027709359	0.032860867
ANGPT2	0.512222642	1.079305884	1.075260862	1.80E-08	4.08E-08
ANXA2	14.93030784	38.10155204	1.351605854	1.13E-13	4.65E-13
APOE	1561.736934	3442.705457	1.140391295	9.47E-14	3.98E-13
AR	12.97469208	6.168716714	-1.072658	7.82E-16	4.83E-15
ASPA	1.88945871	0.512293709	-1.88292991	3.09E-22	5.28E-21
ASS1	561.44122	244.943058	-1.196688583	5.30E-19	4.90E-18
ATF3	26.43104094	9.020999415	-1.550874064	4.93E-17	3.59E-16
AURKA	1.00376201	6.460675696	2.686267809	7.54E-26	3.22E-24
BACH2	0.839827612	0.265114292	-1.663478778	7.93E-16	4.88E-15
BCHE	40.6096666	14.34284631	-1.50149183	3.34E-20	3.82E-19
BDKRB2	0.343736346	0.933366534	1.441141332	0.00029501	0.000433441
BGLAP	0.16376744	0.618402724	1.91689812	1.79E-15	1.01E-14
BIRC5	0.372926577	6.304587025	4.07943835	3.51E-27	3.28E-25
BMP4	1.154478052	3.83860635	1.733341873	0.010398481	0.01285107
BRCA2	0.096258976	0.264029767	1.455707617	1.47E-15	8.55E-15
BSG	47.957559	123.4851457	1.364507373	1.74E-22	3.25E-21
C5AR1	5.28772172	2.6265076	-1.009500494	4.15E-11	1.28E-10
CALR	261.300146	547.2311302	1.066442372	3.79E-20	4.14E-19
CASQ2	0.172061411	0.469051419	1.446822514	1.24E-06	2.30E-06
CCL2	16.39803858	7.682058706	-1.093958366	5.79E-13	2.25E-12
CCL3	6.851203858	2.401242392	-1.512576471	1.52E-15	8.77E-15
CCL4	5.5275912	2.280356319	-1.277391652	2.64E-15	1.46E-14
CCNA2	0.41190101	4.838602925	3.554220982	4.17E-26	2.11E-24
CCNB1	0.876794384	8.646192589	3.301754509	4.18E-27	3.58E-25
CCNF	0.292493146	1.357441632	2.21441544	3.15E-25	1.20E-23
CD34	1.110005824	4.729484402	2.091115667	4.31E-26	2.11E-24
CD4	31.5475496	9.960700855	-1.663208789	9.50E-24	2.22E-22
CD69	2.091927198	0.810744471	-1.367513459	2.06E-13	8.35E-13
CDC25C	0.067885813	1.554826269	4.517499471	9.23E-28	1.32E-25
CDK1	0.328316523	3.886992192	3.565494946	2.20E-27	2.51E-25
CDKN2A	0.214011191	3.792419405	4.147360378	5.70E-24	1.39E-22
CDKN2B	0.776885294	1.986024375	1.354109822	5.46E-14	2.39E-13
CDKN3	0.311953537	4.853436142	3.959603436	1.03E-27	1.32E-25
CHEK1	0.38535841	1.211178375	1.65213857	5.18E-19	4.84E-18
CHGA	0.011596693	1.752231552	7.239336194	2.75E-11	8.65E-11
CHKA	4.84989782	11.11573399	1.196576957	4.91E-15	2.51E-14
CLIC1	40.8019592	99.23968782	1.282278769	3.53E-14	1.63E-13
COL2A1	0.005792919	3.611548516	9.284111234	1.66E-05	2.77E-05
COX6B1	128.4070666	261.066844	1.023694644	3.95E-17	2.92E-16
CPT1B	0.168795535	0.384172442	1.186477289	8.76E-10	2.31E-09
CPT2	32.7890398	16.30804861	-1.007629492	2.45E-21	3.26E-20
CTLA4	0.230411101	0.55485413	1.267898315	0.001034336	0.001435491
CXCL12	38.8263052	7.390092203	-2.393370154	5.08E-27	3.73E-25
CXCL2	54.8380868	22.59336704	-1.279278951	3.04E-15	1.63E-14
CYP17A1	1.23274134	22.59642821	4.196152722	0.008925134	0.011123923
CYP19A1	0.003307809	0.362034726	6.774108187	1.18E-08	2.74E-08
CYP1A2	173.2809558	25.18045722	-2.782736721	1.31E-24	4.17E-23
CYP2B6	138.0547282	28.15373021	-2.29384231	2.17E-22	3.84E-21
CYP2C19	4.584996322	0.392872363	-3.544787987	1.79E-19	1.80E-18
CYP2C8	438.42658	101.6903324	-2.108152735	6.19E-26	2.89E-24
CYP2C9	295.504348	116.116883	-1.347601608	2.89E-18	2.45E-17
CYP4F2	73.3901776	29.21839942	-1.328709839	3.24E-19	3.14E-18
DBH	14.9166565	1.768071089	-3.076676011	8.63E-27	5.76E-25
DMD	4.06395784	1.689467758	-1.266316618	5.19E-22	8.34E-21
DNASE1	0.218403825	0.483779258	1.147350794	6.09E-17	4.34E-16
DNMT1	1.71393938	3.987252906	1.218079032	1.04E-18	9.04E-18
DRD4	0.246456353	1.087821097	2.142037237	4.54E-07	8.85E-07
DUOX1	0.086858237	0.43937078	2.338704347	6.79E-15	3.40E-14
DUSP1	224.372199	103.6188899	-1.114606896	2.95E-15	1.59E-14
E2F1	0.656194663	8.415113717	3.680787003	4.14E-26	2.11E-24
EDNRB	10.36740424	4.023165549	-1.365651712	2.78E-22	4.85E-21
EGR1	139.874766	33.29451983	-2.070779079	6.22E-21	7.61E-20
ENO1	118.1707218	254.9904288	1.109570461	8.30E-09	1.97E-08
EPHX1	499.61494	1064.653893	1.091495979	1.09E-06	2.07E-06
EPHX2	57.0608884	24.12290829	-1.242098358	1.76E-21	2.42E-20
ESR1	3.232078722	0.614962087	-2.393892962	8.07E-25	2.76E-23
ETFDH	30.6130192	11.01403575	-1.474802141	7.15E-26	3.19E-24
EZH2	0.496159756	2.684712254	2.435890842	4.69E-27	3.70E-25
F8	3.11227326	1.306517452	-1.25224234	1.62E-22	3.08E-21
FANCD2	0.183183735	0.90357853	2.302358579	3.63E-25	1.33E-23
FASN	33.76121456	85.28774089	1.33697158	2.61E-08	5.78E-08
FCGR2B	2.536651204	0.783937902	-1.694113875	1.05E-23	2.40E-22
FOS	124.0803012	21.5800679	-2.523502784	1.16E-22	2.26E-21
FOXM1	0.273210824	3.522460208	3.688496861	8.98E-27	5.76E-25
FOXO1	13.36083406	4.494345239	-1.571827215	8.51E-22	1.31E-20
FRZB	1.251130278	2.849965667	1.187712517	6.14E-05	9.62E-05
FTL	4738.53272	12008.57288	1.341552404	3.31E-14	1.54E-13
FXN	8.5372389	3.907297765	-1.127598347	2.22E-24	6.33E-23
G6PD	1.922661548	12.64281153	2.7171406	1.48E-21	2.09E-20
GADD45B	149.1067398	52.56142112	-1.504269283	8.51E-18	6.77E-17
GADD45G	95.2402128	45.89651608	-1.053186198	2.50E-12	8.88E-12
GAPDH	285.868836	797.0047283	1.47923493	7.35E-20	7.70E-19
GBA	8.08879264	21.74633797	1.426776193	8.01E-24	1.91E-22
GCDH	32.1891894	14.54112542	-1.146437315	8.14E-19	7.27E-18
GCH1	30.3895928	12.38851115	-1.294574529	3.67E-20	4.05E-19
GLA	4.7076442	10.7978967	1.197673128	3.91E-17	2.91E-16
GLS	1.74975825	3.858167468	1.140760156	1.77E-07	3.61E-07
GLS2	6.997776926	1.850345936	-1.919101656	5.70E-19	5.23E-18
GPX2	114.824701	271.3089536	1.240503633	0.047107258	0.054976311
GPX8	0.570497338	1.216963167	1.092993444	0.000139137	0.000210758
GSTA4	5.71807768	12.47447505	1.125376981	2.47E-08	5.54E-08
GSTM1	42.72892524	19.8590789	-1.105414319	0.008344238	0.010425222
GSTM5	0.551050402	0.242065978	-1.186783958	1.58E-14	7.67E-14
H2AX	5.860664	16.90316375	1.528157267	7.16E-18	5.79E-17
HAMP	156.5587204	15.19393315	-3.365136586	1.23E-25	5.06E-24
HAO1	187.269742	91.9827512	-1.025682561	1.37E-19	1.40E-18
HBA1	0.642836415	0.256155655	-1.327430915	1.49E-13	6.03E-13
HBB	49.20019084	13.33833619	-1.883085194	2.00E-20	2.31E-19
HGF	3.98738574	0.985005097	-2.017240083	2.36E-24	6.56E-23
HLA-A	232.8658416	493.4665123	1.083453153	9.18E-11	2.72E-10
HMGCL	50.0167832	24.06652895	-1.055384193	5.70E-24	1.39E-22
HMOX1	55.3627334	27.09056156	-1.031124875	4.50E-14	2.02E-13
HP	2615.72404	1209.5382	-1.112754011	8.57E-16	5.21E-15
HSP90AB1	130.0990896	383.069942	1.557996961	1.44E-24	4.36E-23
HSPB1	83.0106532	369.3826456	2.153747685	3.52E-23	7.68E-22
HTR3A	0.008747141	0.348692203	5.31699875	0.007175623	0.00906441
IGF1	2.44743537	1.029291623	-1.249618973	2.31E-13	9.29E-13
IGF2BP1	0.012742891	1.694091036	7.05467494	7.17E-16	4.46E-15
IGF2BP2	0.739416706	3.727206773	2.333635313	5.65E-06	9.94E-06
IL11	0.023520316	0.44922196	4.255449084	1.99E-07	4.04E-07
IL1B	1.274703602	0.36460937	-1.805738284	7.44E-19	6.71E-18
IL1RN	51.3483294	14.70310179	-1.804196799	2.45E-16	1.62E-15
IL2RB	3.237940598	1.563626478	-1.050180598	1.19E-15	7.01E-15
IL33	8.09090022	2.963454083	-1.449020527	2.64E-21	3.46E-20
IL6	1.168382176	0.29823366	-1.969997253	1.26E-08	2.91E-08
IRAK1	11.18986284	29.59181697	1.40300593	8.77E-22	1.32E-20
ITGA2	0.285698593	1.158695329	2.019935434	1.59E-11	5.22E-11
JUN	84.965238	39.57327773	-1.102346145	4.69E-14	2.10E-13
JUNB	109.5063212	52.74756536	-1.05383774	2.81E-15	1.53E-14
KCNJ5	0.201422718	0.827361396	2.038291233	1.22E-14	5.99E-14
KLF4	6.2059049	2.961053426	-1.067531068	3.72E-14	1.71E-13
LCAT	81.6896642	16.98036959	-2.266285692	8.05E-28	1.32E-25
LCN2	5.237404956	137.3207225	4.712553385	1.54E-07	3.16E-07
LDLR	28.35970584	11.68659841	-1.278987499	4.09E-14	1.86E-13
LGALS1	53.0375816	122.9803265	1.213340644	5.94E-05	9.31E-05
LIN28B	0.000188656	0.478642912	11.30897299	5.26E-05	8.34E-05
LMNA	27.7311032	56.70826857	1.032054097	3.43E-19	3.29E-18
LOX	0.525179422	1.687377675	1.683900625	7.62E-08	1.62E-07
LPA	17.49689628	3.809190286	-2.199542766	1.55E-24	4.55E-23
LPL	0.187733613	1.101564806	2.552795482	6.09E-19	5.54E-18
LRRK2	0.992684658	0.428681002	-1.211431014	4.96E-19	4.67E-18
MAP2	0.648898486	1.966122487	1.599288497	3.21E-05	5.17E-05
MAP2K1	20.24003092	9.766550296	-1.05129052	4.72E-22	7.69E-21
MAP2K3	28.8376528	13.75796568	-1.067686581	1.42E-21	2.03E-20
MAPK11	1.222817392	3.247813466	1.409259799	9.62E-13	3.63E-12
MAPK12	0.25223272	1.167769634	2.210928359	1.43E-14	6.96E-14
MAPT	0.064822042	0.544637429	3.07073975	8.56E-22	1.31E-20
MBL2	65.2004007	22.79687574	-1.516044711	1.03E-16	7.17E-16
MECOM	0.304964238	0.702418506	1.203690781	8.10E-10	2.15E-09
MICB	0.658181284	1.622637846	1.301784136	3.79E-11	1.17E-10
MKI67	0.229362456	2.507204034	3.450378241	3.40E-26	1.94E-24
MLYCD	3.70310532	1.606144608	-1.205133791	5.33E-23	1.12E-21
MMP1	0.244098825	2.175557615	3.155847969	4.00E-07	7.83E-07
MMP14	7.49851672	24.92294625	1.732797476	4.38E-09	1.06E-08
MMP9	1.944342803	9.610876051	2.305385342	2.88E-05	4.69E-05
MSH2	1.454056142	3.613117505	1.313161201	1.37E-25	5.40E-24
MSRA	14.97951394	6.17691512	-1.2780324	2.38E-23	5.32E-22
MT3	0.028980235	0.530097205	4.193115738	0.037182036	0.043741067
NAMPT	38.283279	16.4751687	-1.216421166	1.47E-12	5.43E-12
NAT2	33.23059606	5.062386898	-2.714622495	2.75E-27	2.83E-25
NDRG1	9.83039494	24.97718751	1.345289751	4.42E-05	7.05E-05
NES	2.74207782	7.014906337	1.355154326	4.35E-14	1.97E-13
NGFR	9.46809782	2.578103104	-1.87676465	7.57E-23	1.50E-21
NME1	7.37574388	16.46530449	1.158568727	2.83E-15	1.54E-14
NOS2	0.141327764	0.411734135	1.542668152	1.20E-08	2.78E-08
NOX4	0.031269476	0.239818867	2.939118237	4.95E-28	1.18E-25
NPM1	41.4670826	85.10327318	1.03724807	5.92E-18	4.83E-17
NQO1	2.030672614	56.99059601	4.810694309	6.78E-11	2.04E-10
NR3C2	2.551939124	1.01656427	-1.327892485	1.94E-21	2.62E-20
NR4A2	7.124624232	2.109977957	-1.755585998	9.52E-16	5.72E-15
NRG1	1.67727192	0.467665708	-1.842567047	4.80E-16	3.10E-15
NTF3	2.158164972	0.194999269	-3.468264527	3.35E-29	1.15E-26
NUDT1	1.442500324	4.814212833	1.738728281	1.41E-21	2.03E-20
OSGIN1	29.40181378	62.39085888	1.085429513	0.000260371	0.00038586
OXT	6.594545316	2.193442744	-1.588076144	1.44E-16	9.92E-16
OXTR	0.182164367	0.594607304	1.706696401	3.96E-05	6.36E-05
PCNA	19.2954676	47.43184175	1.297593882	1.14E-20	1.35E-19
PDGFRB	4.1680834	10.06461377	1.27183576	1.20E-09	3.09E-09
PDGFRL	0.248722556	0.757564856	1.606832054	1.16E-09	3.00E-09
PDIA2	0.021784328	1.554790385	6.157285664	8.91E-13	3.38E-12
PIK3R2	0.132710061	0.341717607	1.364526834	2.24E-10	6.40E-10
PKM	5.7191752	25.67672639	2.166582274	9.58E-09	2.25E-08
PLA2G6	0.894941198	2.234200655	1.319893962	1.27E-15	7.47E-15
PLAU	1.385660668	4.095125387	1.563333624	6.53E-10	1.77E-09
PLCB1	0.343396236	0.995051455	1.534896906	4.48E-10	1.24E-09
PLG	390.340464	178.8160741	-1.126256596	3.81E-19	3.62E-18
PON3	72.6209348	30.3653886	-1.257957669	8.54E-21	1.02E-19
POU5F1	0.168067995	0.705084903	2.068751967	6.24E-15	3.14E-14
PPOX	1.81936436	4.029901991	1.147310255	4.72E-22	7.69E-21
PRKAA2	0.401344286	1.46473559	1.867727994	1.47E-07	3.03E-07
PRKCB	0.791937704	0.360314204	-1.136131422	6.13E-16	3.84E-15
PTGIS	3.163345172	1.119300365	-1.498853749	6.11E-21	7.56E-20
PTGS2	0.986159638	0.176246123	-2.484229684	2.62E-24	6.89E-23
PVALB	1.608737648	0.129338651	-3.636703694	5.76E-28	1.18E-25
PYCR1	1.289025548	7.525587572	2.545523369	0.001255682	0.001724045
RAD51	0.209501381	1.098373005	2.390336414	4.16E-23	8.91E-22
RCAN1	29.93936208	6.679082901	-2.164321556	1.03E-26	6.20E-25
SCARA3	1.726957944	5.386158708	1.641023791	2.45E-05	4.02E-05
SCN4A	0.04976098	0.24334687	2.289927422	2.03E-15	1.13E-14
SCN4B	0.200899863	0.494990051	1.300922945	4.33E-08	9.40E-08
SCP2	90.358487	44.71796792	-1.014805483	9.65E-17	6.74E-16
SELE	1.252615732	0.599093182	-1.064091584	1.66E-14	8.01E-14
SELP	1.550046394	0.558897235	-1.471656453	6.08E-21	7.56E-20
SERPINE1	137.8530564	46.73173685	-1.560656691	1.39E-13	5.69E-13
SERPINH1	8.99889308	22.19725487	1.302561813	1.90E-12	6.84E-12
SHC1	17.0231022	35.45131292	1.058345088	3.44E-20	3.88E-19
SLC19A3	6.99735282	2.701558591	-1.373017266	1.01E-21	1.50E-20
SLC1A1	21.2556537	9.160545126	-1.214341271	4.11E-15	2.14E-14
SLC1A3	0.519966374	1.224188247	1.235335189	8.05E-08	1.71E-07
SLC7A1	0.632758424	1.273313886	1.008861389	0.006952711	0.008815351
SLC7A11	0.039100664	0.828422795	4.405102233	9.61E-19	8.51E-18
SMARCA4	3.41462756	6.866674781	1.007883407	1.02E-24	3.39E-23
SNCAIP	0.164220311	0.498238793	1.601204783	0.030541375	0.036094352
SOCS3	47.77554588	12.76281691	-1.904325573	9.23E-15	4.56E-14
SORL1	10.7153423	4.455563224	-1.265998219	9.94E-20	1.02E-18
SOX2	0.030239167	0.363522314	3.587553645	0.021705536	0.025950623
SPARC	37.6913662	97.68711605	1.373934208	1.54E-10	4.50E-10
SPP1	13.91781952	482.45372	5.115385447	2.89E-05	4.69E-05
SQSTM1	38.1510286	103.3348622	1.437533201	1.85E-10	5.34E-10
SRC	2.14822794	4.926507092	1.197418054	3.65E-06	6.55E-06
SRXN1	0.546181804	1.418172309	1.376579675	4.96E-07	9.59E-07
STIP1	11.94711384	24.52148945	1.037384475	3.55E-22	5.98E-21
STK39	0.672681814	2.830264996	2.072940978	2.41E-10	6.87E-10
SYP	0.13562591	0.50251054	1.889521038	3.70E-12	1.30E-11
TAZ	2.55405444	5.334230437	1.062490873	5.90E-22	9.32E-21
TEK	2.952863244	1.184612192	-1.317699703	5.74E-20	6.08E-19
TERT	0.002645358	1.369347276	9.015809852	1.34E-24	4.17E-23
TGFB2	0.330834687	0.838766918	1.342159454	0.014300708	0.017463528
THBD	5.60493328	2.54246701	-1.140468145	1.09E-15	6.47E-15
THBS1	30.61294282	12.05827124	-1.344118651	8.92E-15	4.43E-14
TLR3	2.40111724	1.088080268	-1.141920859	1.51E-17	1.17E-16
TLR4	3.577194948	1.333747921	-1.423342721	2.66E-21	3.46E-20
TNFSF11	0.987427492	0.437123959	-1.175632357	6.20E-13	2.39E-12
TNFSF4	0.272191787	0.966230408	1.827743717	1.04E-14	5.10E-14
TP73	0.041411316	0.491950108	3.570415038	1.29E-20	1.50E-19
TRAF2	3.20187596	7.275328752	1.184095022	1.71E-21	2.38E-20
TREM2	1.603299316	4.998674778	1.640501882	7.15E-10	1.92E-09
TRPV4	4.25208984	1.869048442	-1.185868118	1.03E-15	6.13E-15
TUBA1B	12.05910012	27.22226972	1.174665106	7.47E-13	2.84E-12
TXN	116.1237328	261.9858606	1.173826098	9.13E-16	5.52E-15
TXNRD1	9.60165992	27.65450346	1.526158695	6.34E-09	1.52E-08
TYRP1	0.013006425	0.254079987	4.287986421	0.005905861	0.007572183
UCHL1	0.229561148	6.918503098	4.913509526	2.42E-05	3.98E-05
UCN	0.638043253	1.622896008	1.346844426	3.30E-08	7.22E-08
UGT1A1	35.31447524	16.76724291	-1.074614177	5.82E-13	2.26E-12
VIPR1	4.5103498	0.429928785	-3.391069714	2.34E-29	1.15E-26
VWF	2.693858676	7.800021265	1.53380389	1.81E-11	5.90E-11
XDH	21.2733182	9.72348602	-1.129499541	3.08E-15	1.64E-14
