# Supplementary material for: Seven oxidative stress-related genes predict the prognosis of hepatocellular carcinoma
Source: Aging (Albany NY). 2023 Dec 14;15(24):15050–63. doi: 10.18632/aging.205330 (PMC10781471; doi:10.18632/aging.205330)
Supplement: Supplementary Table 3 [file aging-15-205330-s004.xlsx]

## Sheet: Sheet1
Supplementary Table 3. Analysis of the model genes in the signature using the BP network and visualized the network.
id	HR	HR.95L	HR.95H	pvalue	V6
ABCC1	1.097181161	1.042950482	1.154231691	0.000335815	1
ACADL	0.83280988	0.741225692	0.935710006	0.002084698	1
ACADM	0.989902457	0.973134468	1.006959374	0.244294014	1
ACADS	0.984021168	0.971162483	0.997050109	0.016387723	1
ACE	0.842344776	0.585012502	1.21287104	0.356325244	1
ACSL4	1.000596485	0.997529323	1.003673077	0.703431859	1
ACTA1	0.907147804	0.608883666	1.351517843	0.631882571	1
ACTN2	0.971553578	0.911961668	1.035039508	0.371545872	1
ADAMTS13	0.965472638	0.793139232	1.175250671	0.726141656	1
ADH1A	0.997601514	0.995840587	0.999365554	0.0077211	1
ADM	1.013469509	0.994365517	1.032940531	0.168200491	1
ADRB1	0.92984313	0.671772255	1.287055605	0.660997674	1
AGRN	1.018232929	1.005033474	1.031605737	0.006644343	1
AGTR1	0.990753182	0.962639685	1.019687722	0.527050397	1
ALDH2	0.991171216	0.985292914	0.997084588	0.003478009	1
ALDH3A1	1.000506232	1.000108598	1.000904025	0.012581947	1
ANGPT2	1.111244936	0.923785256	1.336744985	0.263148825	1
ANXA2	1.008720721	1.003716518	1.013749873	0.0006218	1
APOE	0.999987412	0.999893605	1.000081228	0.792556688	1
AR	0.9395434	0.894587593	0.986758375	0.012673376	1
ASPA	0.622093537	0.406662718	0.951649493	0.028636496	1
ASS1	0.99952646	0.998737498	1.000316046	0.239739069	1
ATF3	0.984894232	0.962472744	1.007838044	0.195159444	1
AURKA	1.06773318	1.031440919	1.105302421	0.000203597	1
BACH2	0.949242978	0.415516773	2.168533957	0.90164701	1
BCHE	0.990762941	0.975204029	1.006570089	0.250519731	1
BDKRB2	0.875777404	0.746726302	1.02713144	0.102925853	1
BGLAP	0.951014226	0.639277945	1.414764994	0.804253991	1
BIRC5	1.035250994	1.017207728	1.053614312	0.000112541	1
BMP4	0.993365718	0.962278244	1.025457508	0.681570037	1
BRCA2	1.592589218	0.669889199	3.786208857	0.29224111	1
BSG	1.000000193	0.999233913	1.000767062	0.999605262	1
C5AR1	1.010146179	0.933051407	1.093611022	0.803187156	1
CALR	1.000223156	0.999439122	1.001007804	0.577050116	1
CASQ2	0.929424093	0.817459564	1.056724006	0.263768612	1
CCL2	0.994741644	0.978804361	1.010938425	0.522310594	1
CCL3	0.979305524	0.898012798	1.067957285	0.636245093	1
CCL4	0.99158598	0.9258699	1.061966433	0.809158296	1
CCNA2	1.007200899	0.988132361	1.026637413	0.461882462	1
CCNB1	1.052526465	1.032276307	1.073173871	2.41E-07	1
CCNF	1.45545583	1.190646387	1.779161046	0.000249288	1
CD34	0.865083569	0.785963808	0.952167992	0.003061177	1
CD4	0.985988886	0.961031161	1.011594757	0.28073025	1
CD69	0.646656469	0.468709144	0.892162218	0.007933702	1
CDC25C	1.136767413	1.01879157	1.268404835	0.02184917	1
CDK1	1.104289551	1.05524487	1.155613683	1.87E-05	1
CDKN2A	1.028728774	0.982273815	1.07738074	0.229611222	1
CDKN2B	1.091245359	0.968000025	1.230182234	0.153273154	1
CDKN3	1.047275365	1.014070476	1.081567522	0.004955259	1
CHEK1	1.60658509	1.309585091	1.970941536	5.46E-06	1
CHGA	0.999896253	0.988061019	1.011873253	0.986374275	1
CHKA	0.999153192	0.988195206	1.010232691	0.880318408	1
CLIC1	1.004091732	1.002014102	1.00617367	0.0001116	1
COL2A1	1.002048936	0.991266765	1.012948386	0.710768786	1
COX6B1	0.999948449	0.998986837	1.000910988	0.916361679	1
CPT1B	0.880590766	0.424325345	1.827465897	0.732823213	1
CPT2	0.978267891	0.954210356	1.002931964	0.083717639	1
CTLA4	0.922948794	0.698583988	1.219373032	0.57258663	1
CXCL12	0.984469552	0.962300368	1.007149463	0.178005165	1
CXCL2	0.99172637	0.982121647	1.001425022	0.094292	1
CYP17A1	0.998983095	0.996013676	1.001961367	0.502941547	1
CYP19A1	1.074403231	1.008034102	1.145142114	0.027388891	1
CYP1A2	0.999741856	0.996941277	1.002550303	0.856851596	1
CYP2B6	0.99416532	0.987906925	1.000463362	0.069341882	1
CYP2C19	1.050464078	0.955833803	1.154463021	0.306716273	1
CYP2C8	0.996702242	0.994390696	0.999019161	0.005298204	1
CYP2C9	0.996404512	0.994120589	0.998693683	0.002095121	1
CYP4F2	0.991890848	0.983378237	1.000477149	0.064099238	1
DBH	0.978658748	0.92063217	1.040342687	0.489100238	1
DMD	0.971406613	0.812393231	1.1615444	0.750429995	1
DNASE1	0.842536037	0.528420755	1.343374512	0.471629288	1
DNMT1	1.10668561	1.020495537	1.200155213	0.014270143	1
DRD4	1.102055938	0.970557003	1.251371415	0.133878765	1
DUOX1	1.009461945	0.8256215	1.234237988	0.926846064	1
DUSP1	0.998164095	0.995531543	1.000803609	0.172632396	1
E2F1	1.015147984	1.003690047	1.026736723	0.009433269	1
EDNRB	0.923712561	0.853544084	0.999649474	0.048991973	1
EGR1	0.996578186	0.990698369	1.0024929	0.256248418	1
ENO1	1.00139487	1.000948588	1.001841351	8.85E-10	1
EPHX1	0.999805052	0.999494633	1.000115567	0.218479622	1
EPHX2	0.985448597	0.972830342	0.998230519	0.02579299	1
ESR1	0.549827855	0.351105658	0.861024775	0.008953204	1
ETFDH	0.934134687	0.897518033	0.972245215	0.000839032	1
EZH2	1.280139428	1.164014938	1.407848731	3.58E-07	1
F8	0.826879713	0.631049876	1.083480223	0.168039571	1
FANCD2	1.332758043	1.071775923	1.657290449	0.00978432	1
FASN	0.999307572	0.996822905	1.001798433	0.585523199	1
FCGR2B	1.034348948	0.984640247	1.086567148	0.178956499	1
FOS	0.997403452	0.990243805	1.004614866	0.479358861	1
FOXM1	1.085264109	1.041280115	1.131106001	0.000106073	1
FOXO1	0.896185033	0.821051656	0.978193769	0.014148315	1
FRZB	0.876287815	0.786200172	0.976698252	0.017035583	1
FTL	1.000035755	1.000008033	1.000063479	0.011475883	1
FXN	0.933295297	0.837764881	1.039719056	0.21020819	1
G6PD	1.013411906	1.008787141	1.018057873	1.14E-08	1
GADD45B	0.99548705	0.990278124	1.000723376	0.091063407	1
GADD45G	0.992450843	0.986099489	0.998843104	0.02070369	1
GAPDH	1.00046547	1.000252066	1.00067892	1.91E-05	1
GBA	1.018315751	1.00038204	1.036570958	0.045274184	1
GCDH	0.975115438	0.952709339	0.99804849	0.033614623	1
GCH1	0.97846815	0.957153935	1.000256998	0.052733594	1
GLA	1.027092123	1.007923553	1.046625238	0.00541835	1
GLS	1.075243748	1.008922263	1.145924874	0.025520979	1
GLS2	0.961990916	0.900327138	1.027878073	0.251606113	1
GPX2	1.000717152	1.000221291	1.001213258	0.004583077	1
GPX8	0.971993043	0.842474353	1.121423426	0.697033735	1
GSTA4	1.005339688	0.98655563	1.024481396	0.579987676	1
GSTM1	0.994724955	0.987860744	1.001636864	0.13438431	1
GSTM5	0.968185045	0.894735561	1.047664049	0.421850569	1
H2AX	1.027669119	1.015376451	1.040110609	8.78E-06	1
HAMP	0.999059228	0.994359875	1.00378079	0.695604349	1
HAO1	0.994367482	0.990718868	0.998029534	0.002598731	1
HBA1	0.932527604	0.799089091	1.088248784	0.375287638	1
HBB	0.993572336	0.980866452	1.006442808	0.326108645	1
HGF	1.036126048	0.953302102	1.126145829	0.403778084	1
HLA.A	1.000321759	0.999883258	1.000760452	0.150411626	1
HMGCL	0.984715436	0.966533881	1.003239005	0.105259793	1
HMOX1	1.006619367	0.999195982	1.014097904	0.080640685	1
HP	0.999958315	0.999761727	1.000154941	0.677739615	1
HSP90AB1	1.001116325	1.000358941	1.001874283	0.003860356	1
HSPB1	1.000280656	0.999823686	1.000737836	0.228728826	1
HTR3A	0.965962056	0.859017939	1.086220265	0.562944878	1
IGF1	0.9039537	0.752311277	1.086162492	0.281129523	1
IGF2BP1	1.041316543	0.975497344	1.111576726	0.224255421	1
IGF2BP2	1.014917683	0.985675739	1.045027144	0.320852007	1
IL11	1.014439976	1.00017668	1.028906677	0.047209367	1
IL1B	1.034239038	0.738686386	1.448043998	0.844562152	1
IL1RN	0.976424917	0.957176292	0.996060628	0.018848136	1
IL2RB	0.891243769	0.759694579	1.0455721	0.157643312	1
IL33	0.84454401	0.752235971	0.948179311	0.004222967	1
IL6	0.803874245	0.564208892	1.145344944	0.226797007	1
IRAK1	1.016079632	1.007478434	1.024754261	0.000235319	1
ITGA2	1.140484765	1.001559471	1.298680244	0.04731426	1
JUN	0.997601187	0.992040716	1.003192824	0.399694491	1
JUNB	0.996488947	0.991373411	1.001630881	0.180437685	1
KCNJ5	0.913598755	0.753980809	1.107007865	0.356357051	1
KLF4	1.012960024	0.958226114	1.070820335	0.649581664	1
LCAT	0.971808819	0.954563363	0.989365837	0.001746531	1
LCN2	1.000028568	0.999531738	1.000525644	0.910290622	1
LDLR	0.961404298	0.931200174	0.992588114	0.015659532	1
LGALS1	1.000296857	0.999794454	1.000799514	0.246875138	1
LIN28B	1.119268027	0.951346255	1.316829609	0.174282161	1
LMNA	1.004895747	0.997461148	1.012385759	0.1973928	1
LOX	1.065738732	1.014078125	1.120031107	0.012025128	1
LPA	0.938529563	0.883995904	0.996427402	0.037788147	1
LPL	0.998369152	0.963335608	1.034676757	0.928640912	1
LRRK2	0.452380991	0.220845448	0.926659631	0.030146617	1
MAP2	1.068671626	0.972159698	1.174764852	0.169040344	1
MAP2K1	0.980241765	0.919750279	1.044711744	0.539182828	1
MAP2K3	0.99276775	0.965032873	1.021299722	0.615605551	1
MAPK11	1.002217358	0.931004237	1.078877616	0.953033644	1
MAPK12	1.093371816	0.978315154	1.22195994	0.115599501	1
MAPT	1.349187251	1.007248667	1.8072064	0.044601162	1
MBL2	0.989515044	0.979900714	0.999223704	0.034356903	1
MECOM	1.331602651	1.113614931	1.592260998	0.001690855	1
MICB	1.304219269	1.118335315	1.5209999	0.000710325	1
MKI67	1.156889138	1.070951833	1.249722384	0.000215122	1
MLYCD	0.850093523	0.671744796	1.075793966	0.176425519	1
MMP1	1.076848616	1.037416723	1.117779303	0.000100283	1
MMP14	1.000982459	0.999075913	1.002892643	0.312725758	1
MMP9	1.002401711	0.999722383	1.005088219	0.078979215	1
MSH2	1.23738498	1.099512502	1.392545865	0.000409458	1
MSRA	0.925742228	0.872308334	0.982449255	0.010968795	1
MT3	1.10286465	1.047715575	1.160916632	0.000183389	1
NAMPT	0.992310643	0.977326975	1.00752403	0.320048324	1
NAT2	0.973243737	0.939914133	1.007755217	0.127148494	1
NDRG1	1.012981504	1.009023379	1.016955156	1.07E-10	1
NES	0.979641911	0.938591876	1.0224873	0.346320825	1
NGFR	0.94521151	0.887743353	1.006399874	0.07830138	1
NME1	1.025903033	1.00879885	1.043297218	0.002871159	1
NOS2	0.669466143	0.334107707	1.341438424	0.257801129	1
NOX4	0.547700336	0.179165291	1.674295599	0.290986132	1
NPM1	1.008086011	1.004993556	1.011187981	2.78E-07	1
NQO1	1.00228287	1.00080783	1.003760084	0.002408589	1
NR3C2	0.687537581	0.492275121	0.960251504	0.027954769	1
NR4A2	0.968748223	0.885422052	1.059916135	0.488998776	1
NRG1	0.968673688	0.753565423	1.245185469	0.803811094	1
NTF3	0.715704413	0.375465201	1.364261737	0.309510255	1
NUDT1	1.086803962	1.026431839	1.150727022	0.004308686	1
OSGIN1	1.001820082	0.997999169	1.005655624	0.350980155	1
OXT	0.990598312	0.962323787	1.019703586	0.522600912	1
OXTR	1.029021305	0.996748227	1.062339332	0.078470849	1
PCNA	1.010355117	1.005203341	1.015533297	7.82E-05	1
PDGFRB	0.97365213	0.947035067	1.001017282	0.059016887	1
PDGFRL	1.014049289	0.879933678	1.168606209	0.847149806	1
PDIA2	0.984557945	0.940552434	1.030622336	0.504727743	1
PIK3R2	1.055657383	0.72754387	1.531746133	0.775501842	1
PKM	1.003227199	1.000717448	1.005743245	0.011697174	1
PLA2G6	0.982241468	0.864843473	1.115575629	0.782625421	1
PLAU	0.997962527	0.982831137	1.013326876	0.79359874	1
PLCB1	1.113520619	0.862877139	1.436969543	0.408558317	1
PLG	0.998064443	0.996311863	0.999820105	0.030726408	1
PON3	0.99111547	0.981275713	1.001053895	0.079593599	1
POU5F1	1.152138518	0.874554536	1.517827775	0.313970238	1
PPOX	1.040242428	0.93555749	1.156641168	0.465969659	1
PRKAA2	1.079237	0.979584995	1.189026484	0.122908521	1
PRKCB	0.905179594	0.581902271	1.408054474	0.658544702	1
PTGIS	0.927166724	0.806768401	1.065532728	0.286621922	1
PTGS2	0.818465824	0.362106045	1.849972722	0.630190371	1
PVALB	0.892164993	0.509634468	1.561822102	0.689607513	1
PYCR1	1.021197598	1.005247566	1.037400705	0.009012031	1
RAD51	1.386248482	1.133315072	1.695631605	0.001485354	1
RCAN1	0.936171506	0.888631777	0.9862545	0.013120226	1
SCARA3	0.99549318	0.957606696	1.034878595	0.819515769	1
SCN4A	0.269511562	0.088306293	0.822551594	0.021273409	1
SCN4B	0.483945887	0.272241806	0.860277946	0.01340927	1
SCP2	0.991194581	0.984050478	0.99839055	0.016557182	1
SELE	0.720902633	0.483896778	1.073990631	0.107615839	1
SELP	0.54553543	0.341106305	0.872481398	0.011427554	1
SERPINE1	1.001211745	0.999222445	1.003205006	0.232708388	1
SERPINH1	1.001709573	0.996719067	1.006725067	0.502657914	1
SHC1	1.008737981	0.999460313	1.018101771	0.064971461	1
SLC19A3	0.98918772	0.933509982	1.048186269	0.713028595	1
SLC1A1	0.975542399	0.950264306	1.001492918	0.064516663	1
SLC1A3	0.986781103	0.843275027	1.154708623	0.86818908	1
SLC7A1	1.157908489	1.018260053	1.316708895	0.025356835	1
SLC7A11	1.052753818	0.987810207	1.121967148	0.113548663	1
SMARCA4	1.068611985	1.011164341	1.129323423	0.018584575	1
SNCAIP	1.100682576	0.975969332	1.241332174	0.117930661	1
SOCS3	0.992681168	0.981589565	1.003898103	0.200076938	1
SORL1	0.947733891	0.889157828	1.010168836	0.099117794	1
SOX2	1.023634878	0.966628584	1.084003082	0.424278432	1
SPARC	1.000289764	0.998183166	1.002400809	0.787660467	1
SPP1	1.000059255	1.000000162	1.000118352	0.049376834	1
SQSTM1	1.002093952	1.001321781	1.002866718	1.05E-07	1
SRC	1.046628353	1.003257549	1.091874075	0.03480846	1
SRXN1	1.279981053	1.127835487	1.452651131	0.000131726	1
STIP1	1.036611065	1.021773722	1.051663863	1.02E-06	1
STK39	1.050158153	0.987889154	1.116352115	0.116586349	1
SYP	1.012898283	0.736132025	1.393721366	0.937269989	1
TAZ	1.020695026	0.934987425	1.114259196	0.647131407	1
TEK	0.711309225	0.556326162	0.909467948	0.006591848	1
TERT	0.949390769	0.882356516	1.021517739	0.164493396	1
TGFB2	1.035218767	1.003588492	1.06784594	0.028799887	1
THBD	0.888984358	0.797280967	0.991235488	0.034137689	1
THBS1	0.990711228	0.977348522	1.004256634	0.178009306	1
TLR3	0.921238671	0.709667304	1.195885288	0.537744335	1
TLR4	0.926724213	0.766634892	1.120243516	0.431587752	1
TNFSF11	0.854123241	0.607756449	1.200359967	0.363795713	1
TNFSF4	1.0944258	0.954696652	1.254605669	0.195418028	1
TP73	1.123800985	0.809323291	1.560474866	0.485890775	1
TRAF2	1.047241175	0.999191316	1.097601692	0.054078866	1
TREM2	1.016018887	0.996255256	1.036174587	0.112823631	1
TRPV4	1.03671205	0.966341464	1.11220714	0.314751224	1
TUBA1B	1.013738335	1.006277257	1.021254734	0.000294333	1
TXN	1.001575509	1.000542304	1.002609781	0.002794246	1
TXNRD1	1.013073937	1.008523421	1.017644985	1.56E-08	1
TYRP1	1.084273675	0.746562757	1.574749599	0.670880966	1
UCHL1	1.002849987	0.997706196	1.008020297	0.278054923	1
UCN	1.050231032	0.912815733	1.208332833	0.493345497	1
UGT1A1	1.002613588	0.996176011	1.009092766	0.427077385	1
VIPR1	0.804580331	0.562333565	1.151184188	0.234183295	1
VWF	0.956768251	0.919575443	0.995465344	0.028915678	1
XDH	0.97213774	0.948405115	0.996464243	0.025035984	1
